# Supplementary material for: Controlled synthesis of cyclosiloxanes by NHC-catalyzed hydrolytic oxidation of dihydrosilanes
Source: Royal Society of Chemistry journal article supplement (doi:10.1039/c6dt04882j), 2017-01-01
Supplement: c6dt04882j1.pdf [file c6dt04882j1.pdf]

## Supporting Information for

### Controlled synthesis cyclosiloxanes by NHC-catalyzed hydrolytic oxidation of dihydrosilanes

Guoping Qin, Chunming Cui\*

*State Key Laboratory of Elemento-Organic Chemistry, Nankai University, Tianjin 300071;  
Collaborative Innovation Center of Chemical Science and Engineering (Tianjin), 300072, Tianjin,  
China*

E-mail: [cmcui@nankai.edu.cn](mailto:cmcui@nankai.edu.cn)

#### Contents

|                                                                       |     |
|-----------------------------------------------------------------------|-----|
| General conditions, Table S1 and Reactions in CH <sub>3</sub> CN..... | S2  |
| Reactions under solvent-free conditions .....                         | S5  |
| The NMR and GC-MS spectra for the resulting cyclosiloxanes.....       | S7  |
| References.....                                                       | S20 |



78.8 (s).

**Ph<sub>3</sub>SiOSiPh<sub>3</sub>.**<sup>[S4]</sup> 1 h at room temperature, white solid, 98% yield. <sup>1</sup>H NMR (400 MHz, CDCl<sub>3</sub>): δ 7.51-7.49 (m, 12H, *o*-C<sub>6</sub>H<sub>5</sub>), 7.42-7.38 (m, 6H, *p*-C<sub>6</sub>H<sub>5</sub>), 7.31-7.27 (m, 12H, *m*-C<sub>6</sub>H<sub>5</sub>); <sup>13</sup>C{<sup>1</sup>H} NMR (101MHz, CDCl<sub>3</sub>): δ 135.48, 135.23, 129.83, 127.74; <sup>29</sup>Si NMR (79 MHz, CDCl<sub>3</sub>): δ -18.57 (s) .

**(EtO)<sub>3</sub>SiOSi(OEt)<sub>3</sub>.**<sup>[S3]</sup> 2 h at room temperature, colorless oil, 88% yield. <sup>1</sup>H NMR (400 MHz, CDCl<sub>3</sub>): δ 3.64 (q, *J* = 7.1 Hz, 12H, CH<sub>2</sub>CH<sub>3</sub>), 1.20 (t, *J* = 7.1 Hz, 18H, CH<sub>2</sub>CH<sub>3</sub>); <sup>13</sup>C{<sup>1</sup>H} NMR (101 MHz, CDCl<sub>3</sub>): δ 57.31 (CH<sub>2</sub>CH<sub>3</sub>), 17.98 (CH<sub>2</sub>CH<sub>3</sub>); <sup>29</sup>Si NMR (79 MHz, CDCl<sub>3</sub>): δ 8.87 (s).

**PhMe<sub>2</sub>SiOSiPhMe<sub>2</sub>.**<sup>[S4]</sup> 1 h at room temperature, colorless oil, 95% yield. <sup>1</sup>H NMR (400 MHz, CDCl<sub>3</sub>): δ 7.62-7.60 (m, 4H, *o*-C<sub>6</sub>H<sub>5</sub>), 7.43-7.38 (m, 6H, *m*, *p*-C<sub>6</sub>H<sub>5</sub>), 0.38 (s, 12H, Me); <sup>13</sup>C{<sup>1</sup>H} NMR (101 MHz, CDCl<sub>3</sub>): δ 139.96, 133.15, 129.40, 127.86, (C<sub>6</sub>H<sub>5</sub>), 1.01 (Me<sub>2</sub>); <sup>29</sup>Si NMR (79 MHz, CDCl<sub>3</sub>): δ 1.17 (s).

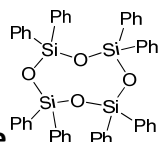

**Hydrolysis of Diphenylsilane (D<sub>4</sub>).**<sup>[S5]</sup> 5 min at room temperature, white solid, 91% yield. <sup>1</sup>H NMR (400 MHz, C<sub>6</sub>D<sub>6</sub>): δ 7.72-7.70 (d, *J* = 8 Hz, 16H, *o*-C<sub>6</sub>H<sub>5</sub>), 7.13-7.09 (t, *J* = 8.0 Hz, 8H, *p*-C<sub>6</sub>H<sub>5</sub>), 7.05-7.01 (t, *J* = 8 Hz, 16H, *m*-C<sub>6</sub>H<sub>5</sub>); <sup>13</sup>C{<sup>1</sup>H} NMR (101 MHz, CDCl<sub>3</sub>): δ 134.49, 134.45, 130.12, 127.70, (C<sub>6</sub>H<sub>5</sub>); <sup>29</sup>Si NMR (79 MHz, C<sub>6</sub>D<sub>6</sub>): δ -42.82 (s, Si).

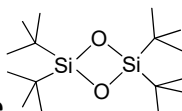

**Hydrolysis of Di(*tert*)butylsilane (tBuD<sub>2</sub>).** 12 h at 40°C, white solid, 83 % yield. <sup>1</sup>H NMR (400 MHz, C<sub>6</sub>D<sub>6</sub>): δ 1.05 (s, 36H, C(CH<sub>3</sub>)<sub>3</sub>); <sup>13</sup>C{<sup>1</sup>H} NMR (101 MHz, C<sub>6</sub>D<sub>6</sub>): δ 27.31 (C(CH<sub>3</sub>)<sub>3</sub>), 19.79 (C(CH<sub>3</sub>)<sub>3</sub>); <sup>29</sup>Si NMR (79 MHz, CDCl<sub>3</sub>): δ -7.19 (s, Si); MS (EI): *m/z* 176.1 [<sup>t</sup>BuD<sub>2</sub>/2+H<sub>2</sub>O]<sup>+</sup>. The NMR spectra are given in Figures S1-S3.

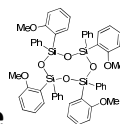

**Hydrolysis of *o*-methoxy-phenylphenylsilane (OMeD<sub>4</sub>).** 6 min at room temperature, white solid, 92% yield. <sup>1</sup>H NMR (400 MHz, C<sub>6</sub>D<sub>6</sub>): δ 7.92-7.89 (2H), 7.83-7.81 (2H), 7.57-7.54 (4H), 7.50-7.46 (2H), 7.42-7.32 (5H), 7.29-7.27 (2H), 7.25-7.04 (11H), 6.77-6.52 (6H), 6.28-6.22 (2H), 3.37 (s, 3H), 3.30 (s, 3H), 2.98 (s, 3H), 2.84 (s, 3H). <sup>13</sup>C{<sup>1</sup>H} NMR (101MHz, CDCl<sub>3</sub>): δ 139.00, 136.88, 134.61, 134.45, 134.30, 133.92, 130.09, 127.69, 125.42, 114.60 (*o*-OCH<sub>3</sub>-C<sub>6</sub>H<sub>4</sub>, C<sub>6</sub>H<sub>5</sub>), 53.88 (OMe); <sup>29</sup>Si NMR (79 MHz, C<sub>6</sub>D<sub>6</sub>): δ -42.82 (s, Si); MS (ESI): *m/z* 930.2736 [<sup>OMe</sup>D<sub>4</sub>+H<sub>2</sub>O]<sup>+</sup>. The NMR spectra are given in Figures S4-S6.

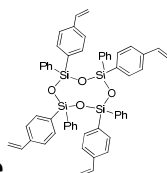

**Hydrolysis of *p*-vinyl-phenylphenylsilane (*p*-vinyD<sub>4</sub>).** 7 min at room temperature, white solid, 90% yield. <sup>1</sup>H NMR (400 MHz, C<sub>6</sub>D<sub>6</sub>): δ 7.80-7.77 (m, 8H), 7.69-7.65 (m, 8H), 7.13-7.07 (m, 20H, C<sub>6</sub>H<sub>5</sub>), 6.53-6.45 (dd, *J* = 12 Hz, 4H, CHCH<sub>2</sub>), 5.59-5.54 (d, *J* = 12 Hz, 4H, CHCH<sub>2</sub>), 5.07-5.02 (d, *J* = 12 Hz, 4H, CHCH<sub>2</sub>); <sup>13</sup>C{<sup>1</sup>H} NMR (101 MHz, CDCl<sub>3</sub>): δ 139.00, 136.88, 134.61, 134.45, 134.30, 133.92, 130.09, 127.69 (*p*-C<sub>2</sub>H<sub>3</sub>C<sub>6</sub>H<sub>4</sub>, C<sub>6</sub>H<sub>5</sub>), 125.42 (CHCH<sub>2</sub>), 114.60 (CHCH<sub>2</sub>); <sup>29</sup>Si NMR (79 MHz, CDCl<sub>3</sub>): δ -42.94 (*s*, Si); MS (ESI): *m/z* 914.2942 [<sup>*p*</sup>-vinyD<sub>4</sub>+H<sub>2</sub>O]<sup>+</sup>. The NMR spectra are given in Figures S7-S9.

### Hydrolysis of Diethylsilane.<sup>[S6]</sup>

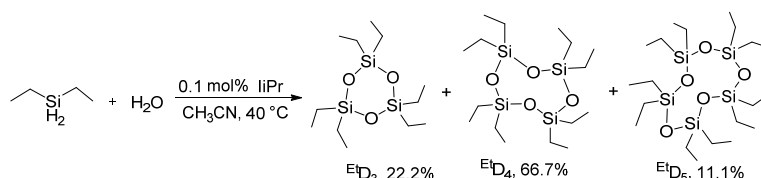

12 h at 40 °C, colorless oil, 83% yield. A mixture containing EtD<sub>3</sub>, EtD<sub>4</sub> and EtD<sub>5</sub> were obtained, the ratio of EtD<sub>3</sub>/EtD<sub>4</sub>/EtD<sub>5</sub> = 22 /67/11 estimated by GC-MS. <sup>1</sup>H NMR (400 MHz, C<sub>6</sub>D<sub>6</sub>): δ 1.10-1.06 (t, *J* = 8 Hz, CH<sub>2</sub>CH<sub>3</sub>), 0.66-0.64 (q, *J* = 8 Hz, CH<sub>2</sub>CH<sub>3</sub>). GC-MS: *m/z* 481.2 [D<sub>5</sub>-C<sub>2</sub>H<sub>5</sub>]<sup>+</sup>, 379.0 [D<sub>4</sub>-C<sub>2</sub>H<sub>5</sub>]<sup>+</sup>, 277.0 [D<sub>3</sub>-C<sub>2</sub>H<sub>5</sub>]<sup>+</sup>. The <sup>1</sup>H NMR spectrum and GC-MS spectra are given in Figures S10-S14.

### Hydrolysis of Vinylphenylsilane.<sup>[S7]</sup>

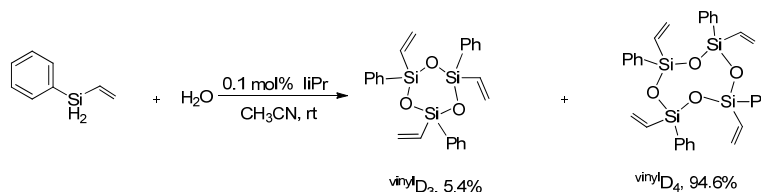

12 min at room temperature, colorless oil, 88% yield. A mixture containing vinyD<sub>3</sub> and vinyD<sub>4</sub> were obtained, the ratio of vinyD<sub>3</sub> and vinyD<sub>4</sub> = 5/95 estimated by GC-MS. <sup>1</sup>H NMR (400 MHz, C<sub>6</sub>D<sub>6</sub>): δ 7.93-7.62, 7.25-7.02 (C<sub>6</sub>H<sub>5</sub>), 6.39-5.75 (C<sub>2</sub>H<sub>3</sub>). MS (EI): *m/z* 714.0 [vinyD<sub>5</sub>-C<sub>2</sub>H<sub>3</sub>]<sup>+</sup>, 565.1 [vinyD<sub>4</sub>-C<sub>2</sub>H<sub>3</sub>]<sup>+</sup>. The <sup>1</sup>H NMR spectrum and GC-MS spectra are given in Figures S15-S18.

### Hydrolysis of Allylphenylsilane.

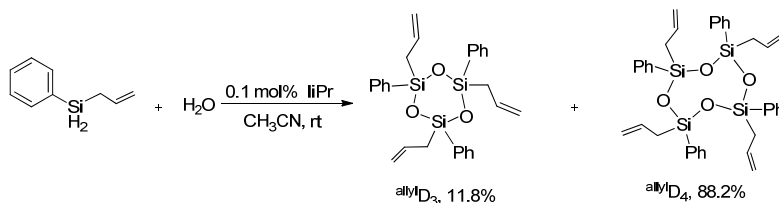

16 min at room temperature. Colorless oil. 85% yield. A mixture containing  $^{\text{allyl}}\text{D}_3$  and  $^{\text{allyl}}\text{D}_4$  were obtained, the ratio of  $^{\text{allyl}}\text{D}_3$  and  $^{\text{allyl}}\text{D}_4 = 12/88$  estimated by GC-MS.  $^1\text{H}$  NMR (400 MHz,  $\text{C}_6\text{D}_6$ ):  $\delta$  7.90-7.47, 7.29-6.98 (m,  $\text{C}_6\text{H}_5$ ), 6.09-5.55 ( $\text{CH}_2\text{CH}=\text{CH}_2$ ), 5.15-4.64 ( $\text{CH}_2\text{CH}=\text{CH}_2$ ), 2.09-1.69 ( $\text{CH}_2\text{CH}=\text{CH}_2$ ). MS (EI):  $m/z$  649.2 [ $^{\text{allyl}}\text{D}_4$ ] $^+$ , 607.2 [ $^{\text{allyl}}\text{D}_4\text{-C}_3\text{H}_5$ ] $^+$ , 571.2 [ $^{\text{allyl}}\text{D}_4\text{-C}_6\text{H}_5$ ] $^+$ , 549.1 [ $^{\text{allyl}}\text{D}_4\text{-C}_6\text{H}_5\text{-C}_3\text{H}_5\text{+H}_2\text{O}$ ] $^+$ , 487.1 [ $^{\text{allyl}}\text{D}_3$ ] $^+$ , 447.1 [ $^{\text{allyl}}\text{D}_3\text{-C}_3\text{H}_5$ ] $^+$ , 409.0 [ $^{\text{allyl}}\text{D}_3\text{-C}_6\text{H}_5$ ] $^+$ . The  $^1\text{H}$  NMR spectrum and GC-MS spectra are given in Figures S19-S22.

### Hydrolysis of Methylphenylsilane.<sup>[S8]</sup>

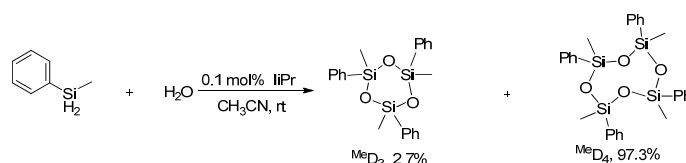

6 min at room temperature, colorless oil, 92% yield. A mixture containing  $^{\text{CH}_3}\text{D}_3$  and  $^{\text{CH}_3}\text{D}_4$  were obtained, the ratio of  $^{\text{CH}_3}\text{D}_3$  and  $^{\text{CH}_3}\text{D}_4 = 3/97$  estimated by GC-MS.  $^1\text{H}$  NMR (400 MHz,  $\text{C}_6\text{D}_6$ ):  $\delta$  7.84-7.49, 7.27-7.04 (m,  $\text{C}_6\text{H}_5$ ), 0.56-0.26 (Me). MS (EI):  $m/z$  529.2 [ $^{\text{CH}_3}\text{D}_4\text{-CH}_3$ ] $^+$ , 451.1 [ $^{\text{CH}_3}\text{D}_4\text{-C}_6\text{H}_5\text{-CH}_3$ ] $^+$ , 393.2 [ $^{\text{CH}_3}\text{D}_3\text{-CH}_3$ ] $^+$ , 315.1 [ $^{\text{CH}_3}\text{D}_3\text{-C}_6\text{H}_5\text{-CH}_3$ ] $^+$ . The  $^1\text{H}$  NMR spectrum and GC-MS spectra are given in Figures S23-S26.

### 3. Reactions under solvent-free conditions and spectroscopic data for the Si–O coupling products

**Hydrolysis of Diphenylsilane ( $\text{D}_4$ ).**<sup>[5]</sup> 10 h at 90 °C, white solid, 90% yield. Spectroscopic data are the same as those obtained in  $\text{CH}_3\text{CN}$ .

**Hydrolysis of Di(*tert*)butylsilane ( $^{\text{tBu}}\text{D}_2$ ).** 5 h at 60 °C, white solid, 83% yield. Spectroscopic data are the same as those obtained in  $\text{CH}_3\text{CN}$ .

**Hydrolysis of *o*-methoxy-phenylphenylsilane ( $^{\text{OMe}}\text{D}_4$ ).** 12 h at 60 °C, white solid, 95% yield. Spectroscopic data are the same as those obtained in  $\text{CH}_3\text{CN}$ .

**Hydrolysis of *p*-vinyl-phenylphenylsilane ( $^{\text{p-vinyl}}\text{D}_4$ ).** 10 h at 90 °C, white solid, 90% yield. Spectroscopic data are the same as those obtained in  $\text{CH}_3\text{CN}$ .

**Hydrolysis of Diethylsilane.** 6 h at 60 °C, colorless oil, 90% yield. A mixture containing  $^{\text{Et}}\text{D}_3$ ,  $^{\text{Et}}\text{D}_4$  and  $^{\text{Et}}\text{D}_5$  were obtained, the ratio of  $^{\text{Et}}\text{D}_3/{}^{\text{Et}}\text{D}_4/{}^{\text{Et}}\text{D}_5 = 7/56/37$  estimated by GC-MS.  $^1\text{H}$  NMR (400 MHz,  $\text{C}_6\text{D}_6$ ):  $\delta$  1.10-1.06 (t,  $J = 8$  Hz,  $\text{CH}_2\text{CH}_3$ ), 0.66-0.64 (q,  $J = 8$  Hz,  $\text{CH}_2\text{CH}_3$ ); GC-MS:  $m/z$  481.2 [ $\text{D}_5\text{-C}_2\text{H}_5$ ] $^+$ , 379.0 [ $\text{D}_4\text{-C}_2\text{H}_5$ ] $^+$ , 277.0

$[D_3-C_2H_5]^+$ . The  $^1H$  NMR spectrum and GC-MS spectra are given in Figures S10-S14.

**Hydrolysis of Vinylphenylsilane.**<sup>[7]</sup> 5 h at 60 °C, colorless oil, 80% yield. A mixture containing  $^{vinyl}D_4$  and  $^{vinyl}D_5$  were obtained, the ratio of  $^{vinyl}D_4$  and  $^{vinyl}D_5 = 5/95$  estimated by GC-MS.  $^1H$  NMR (400 MHz,  $C_6D_6$ ):  $\delta$  7.93-7.62, 7.25-7.02 (m,  $C_6H_5$ ), 6.39-5.75 ( $C_2H_3$ ); MS (EI):  $m/z$  714.0 [ $^{vinyl}D_5-C_2H_3$ ] $^+$ , 565.1 [ $^{vinyl}D_4-C_2H_3$ ] $^+$ . The  $^1H$  NMR spectrum and GC-MS spectra are given in Figures S15-S18.

**Hydrolysis of Allylphenylsilane.** 8 h at 60 °C, colorless oil, 95% yield. A mixture containing  $^{allyl}D_3$  and  $^{allyl}D_4$  were obtained, the ratio of  $^{allyl}D_3$  and  $^{allyl}D_4 = 12/88$  estimated by GC-MS.  $^1H$  NMR (400 MHz,  $C_6D_6$ ):  $\delta$  7.90-7.47, 7.29-6.98 (m,  $C_6H_5$ ), 6.09-5.55 ( $CH_2CH=CH_2$ ), 5.15-4.64 ( $CH_2CH=CH_2$ ), 2.09-1.69 ( $CH_2CH=CH_2$ ). MS (EI):  $m/z$  649.2 [ $^{allyl}D_4$ ] $^+$ , 607.2 [ $^{allyl}D_4-C_3H_5$ ] $^+$ , 571.2 [ $^{allyl}D_4-C_6H_5$ ] $^+$ , 549.1 [ $^{allyl}D_4-C_6H_5-C_3H_5+H_2O$ ] $^+$ , 487.1 [ $^{allyl}D_3$ ] $^+$ , 447.1 [ $^{allyl}D_3-C_3H_5$ ] $^+$ , 409.0 [ $^{allyl}D_3-C_6H_5$ ] $^+$ . The  $^1H$  NMR spectrum and GC-MS spectra are given in Figures S19-S22.

**Hydrolysis of Methylphenylsilane.**<sup>[8]</sup> 10 h at 60 °C, colorless oil, 92% yield. A mixture containing  $^{Me}D_3$  and  $^{Me}D_4$  were obtained, the ratio of  $^{Me}D_3$  and  $^{Me}D_4 = 3/97$  estimated by GC-MS.  $^1H$  NMR (400 MHz,  $C_6D_6$ ):  $\delta$  7.84-7.49, 7.27-7.04 (m,  $C_6H_5$ ), 0.56-0.26 (*Me*); MS(EI):  $m/z$  529.2 [ $^{CH_3}D_4-CH_3$ ] $^+$ , 451.1 [ $^{CH_3}D_4-C_6H_5-CH_3$ ] $^+$ , 393.2 [ $^{CH_3}D_3-CH_3$ ] $^+$ , 315.1 [ $^{CH_3}D_3-C_6H_5-CH_3$ ] $^+$ . The  $^1H$  NMR spectrum and GC-MS spectra are given in Figures S23-S26.

#### 4. NMR and GC-MS Spectra for the Resulting Cyclosiloxanes

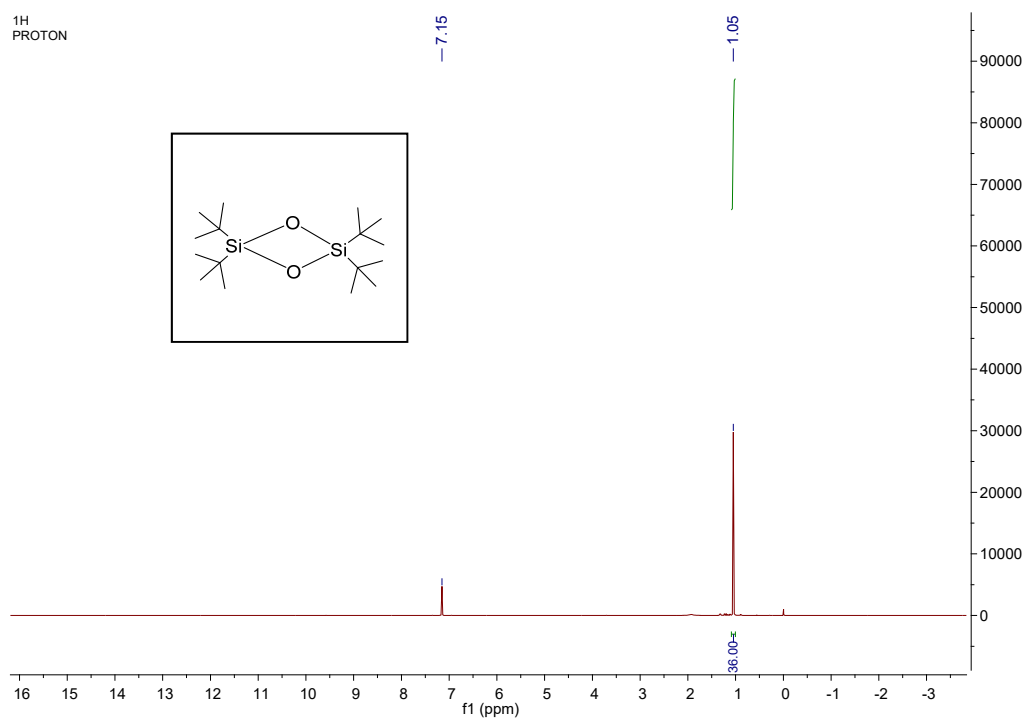

Figure S1.  $^1\text{H}$  NMR spectrum of  $t\text{BuD}_2$  in  $\text{C}_6\text{D}_6$ .

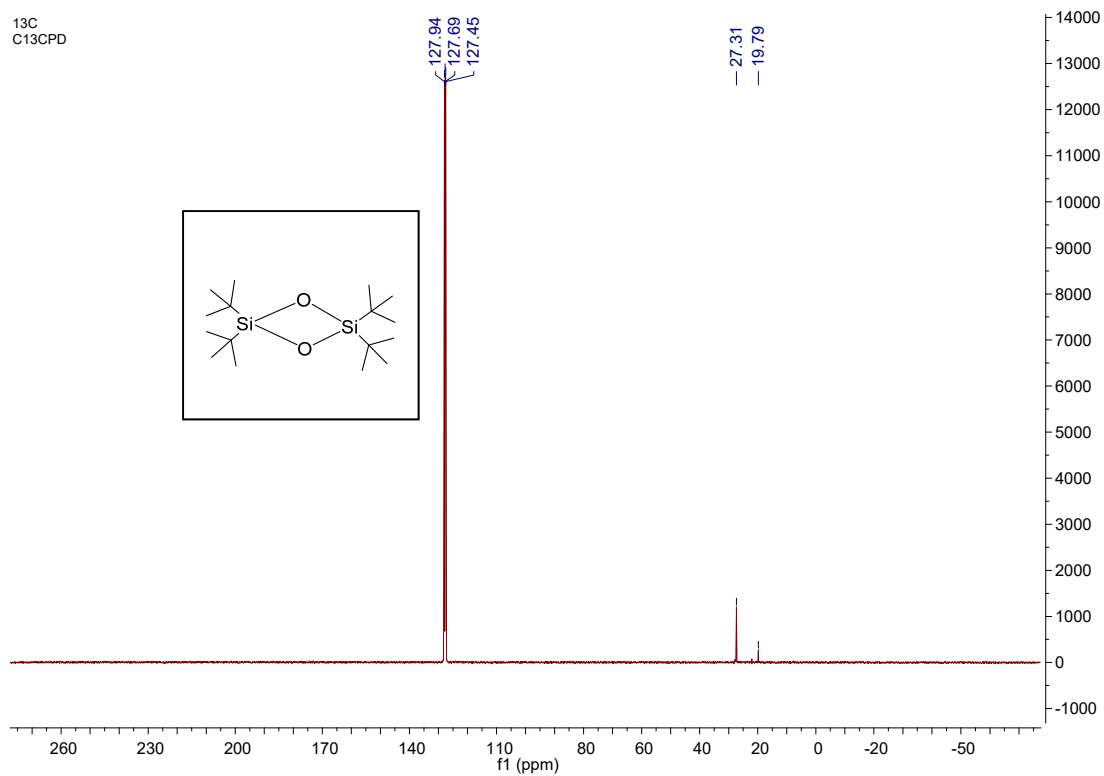

Figure S2.  $^{13}\text{C}$  NMR spectrum of  $t\text{BuD}_2$  in  $\text{C}_6\text{D}_6$ .

ggp-tBu-2014-07-24  
Si29

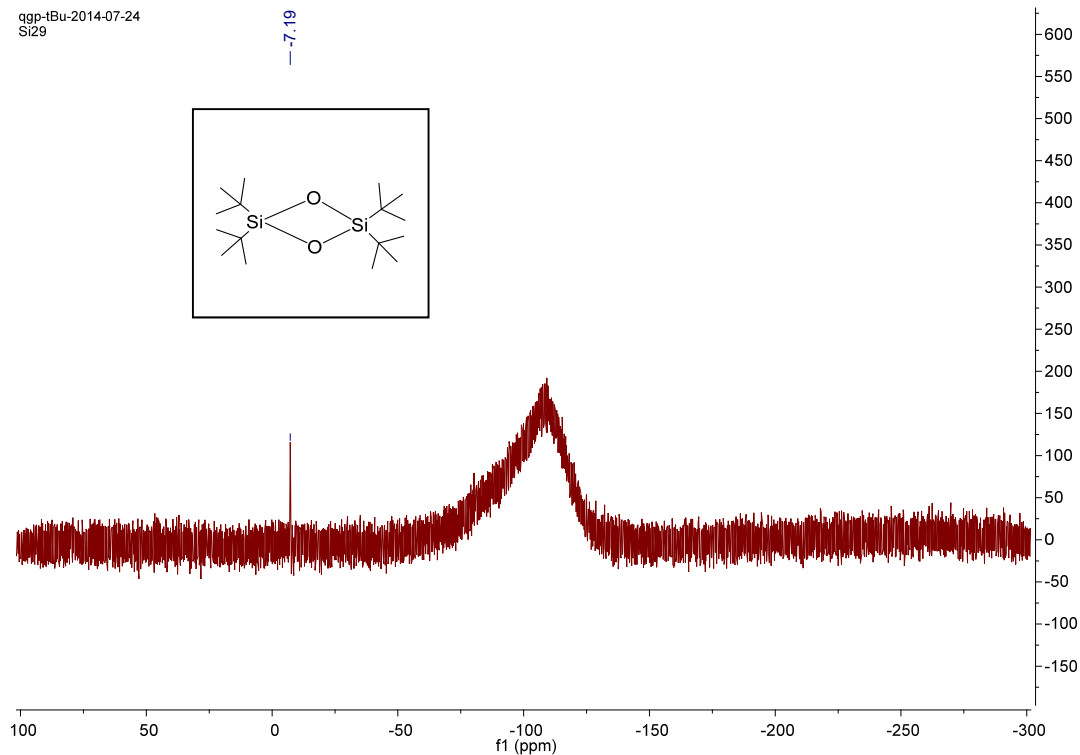

Figure S3.  $^{29}\text{Si}$  NMR spectrum of  $t\text{BuD}_2$  in  $\text{CDCl}_3$

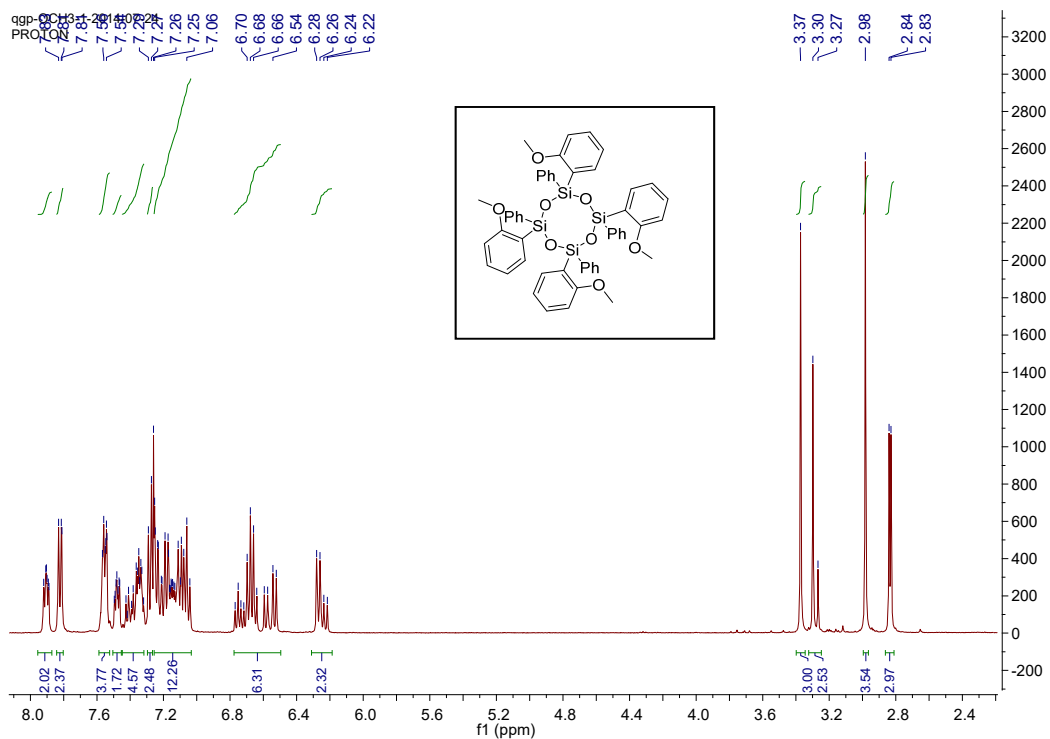

Figure S4.  $^1\text{H}$  NMR spectrum of  $\text{OMeD}_4$  in  $\text{C}_6\text{D}_6$



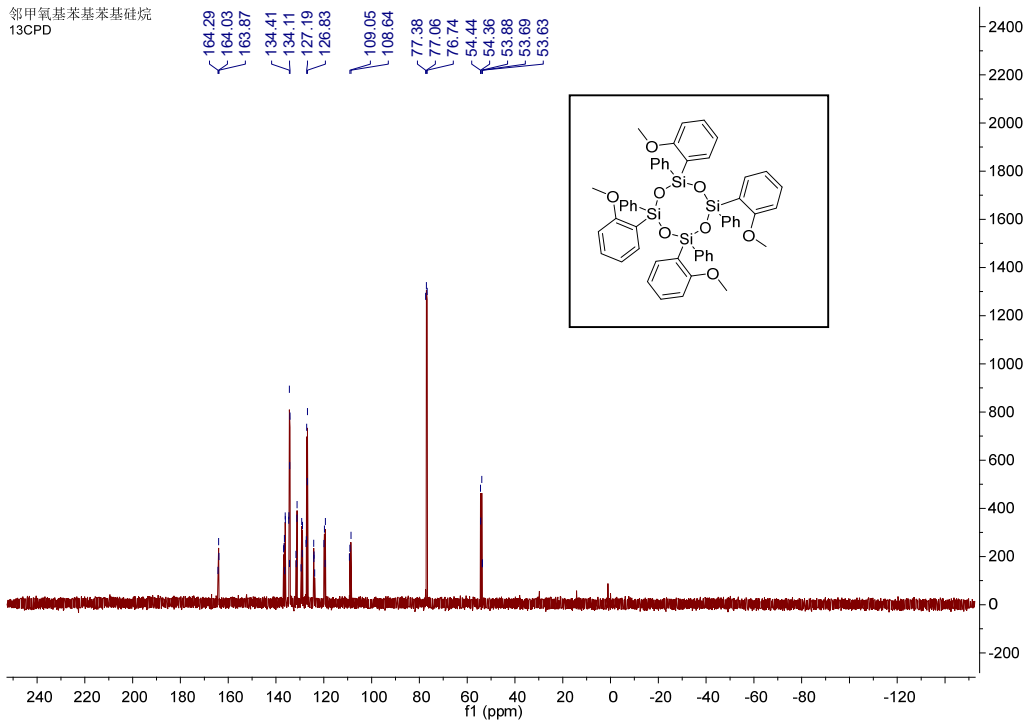

Figure S5.  $^{13}\text{C}$  NMR spectrum of  $^{\text{OMe}}\text{D}_4$  in  $\text{CDCl}_3$ .

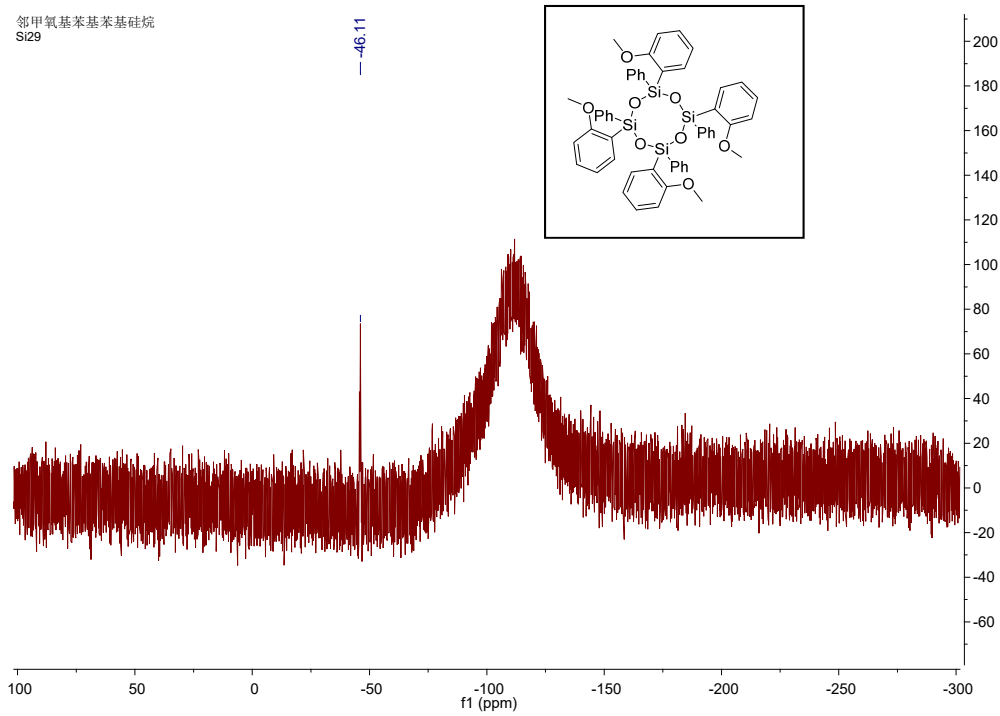

Figure S6.  $^{29}\text{Si}$  NMR spectrum of  $^{\text{OMe}}\text{D}_4$  in  $\text{CDCl}_3$ .



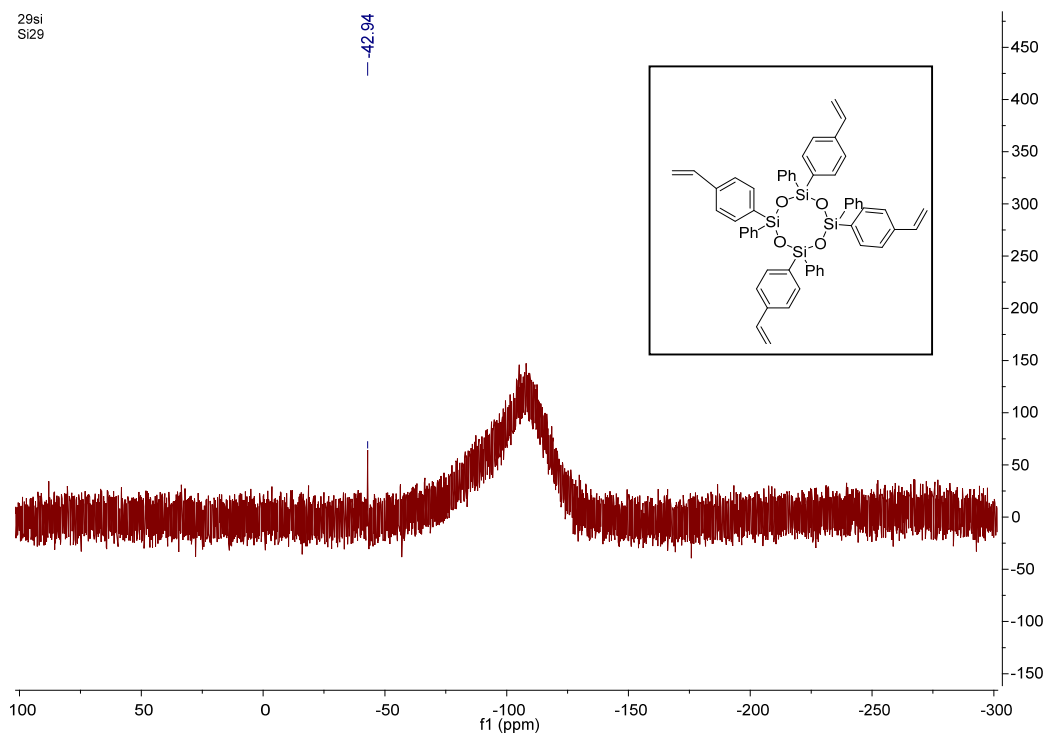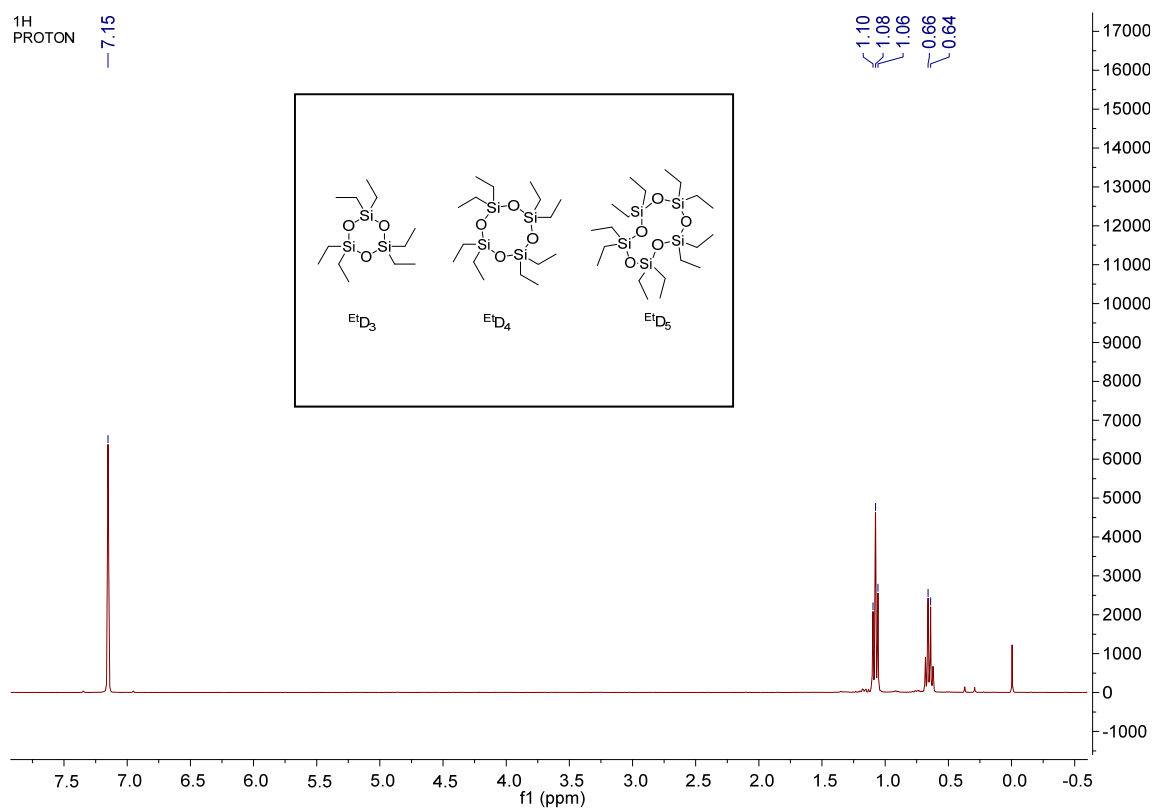

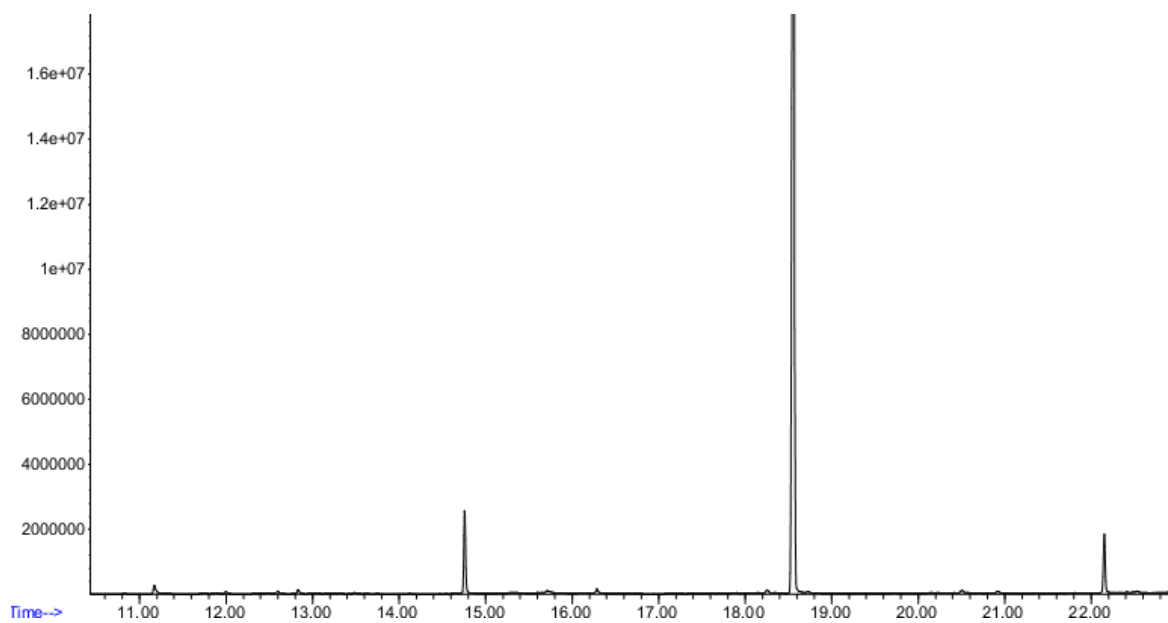

Figure S11. GC-MS spectrum of  $^{Et}D_3$ ,  $^{Et}D_4$ ,  $^{Et}D_5$ .

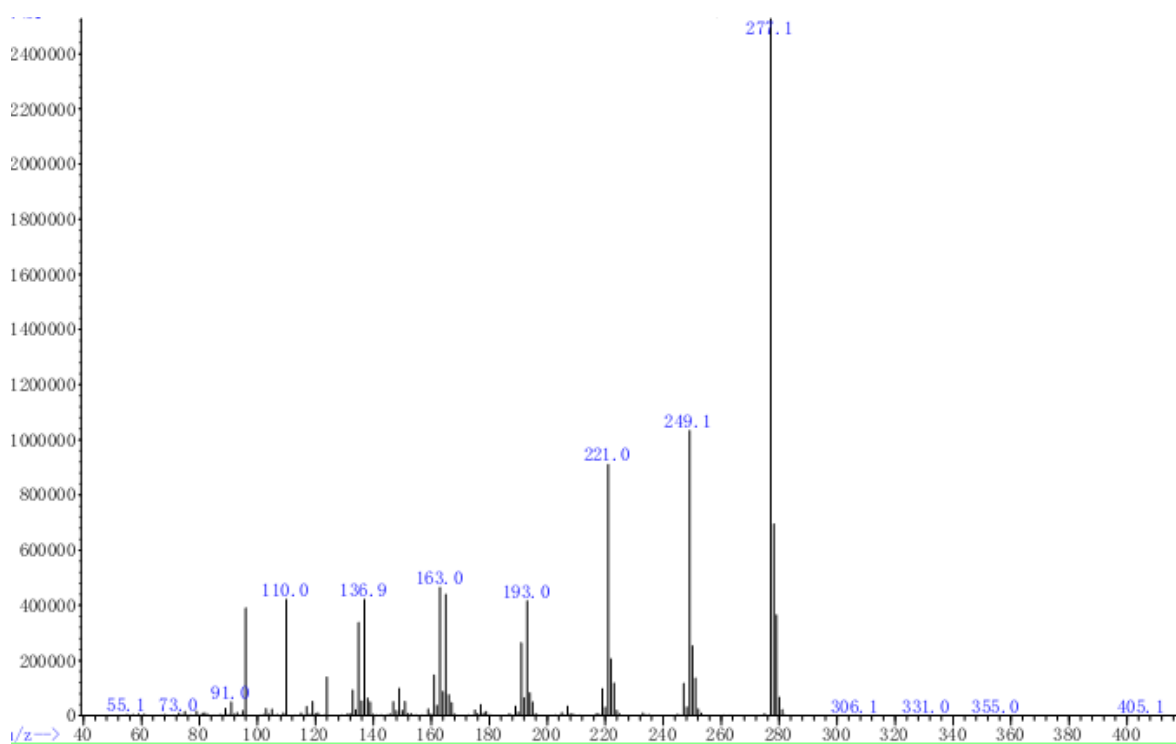

Figure S12. GC-MS spectrum of  $^{Et}D_3$ .

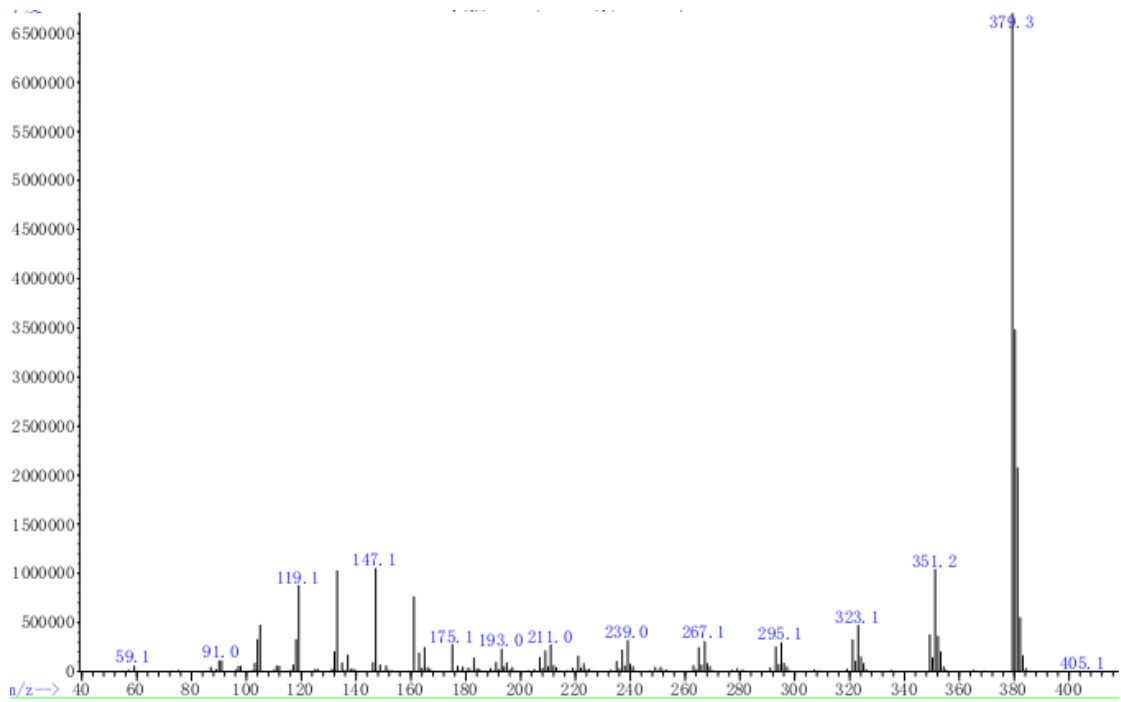

Figure S13. GC-MS spectrum of  $\text{EtD}_4$ .

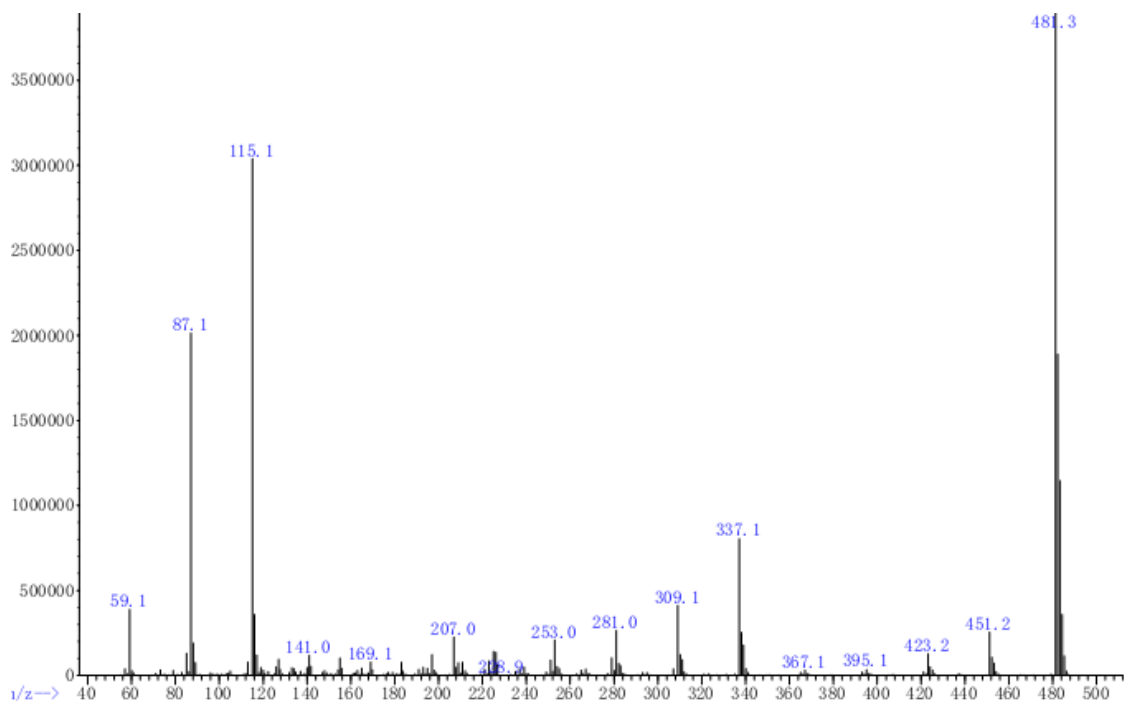

Figure S14. GC-MS spectrum of  $\text{EtD}_5$ .

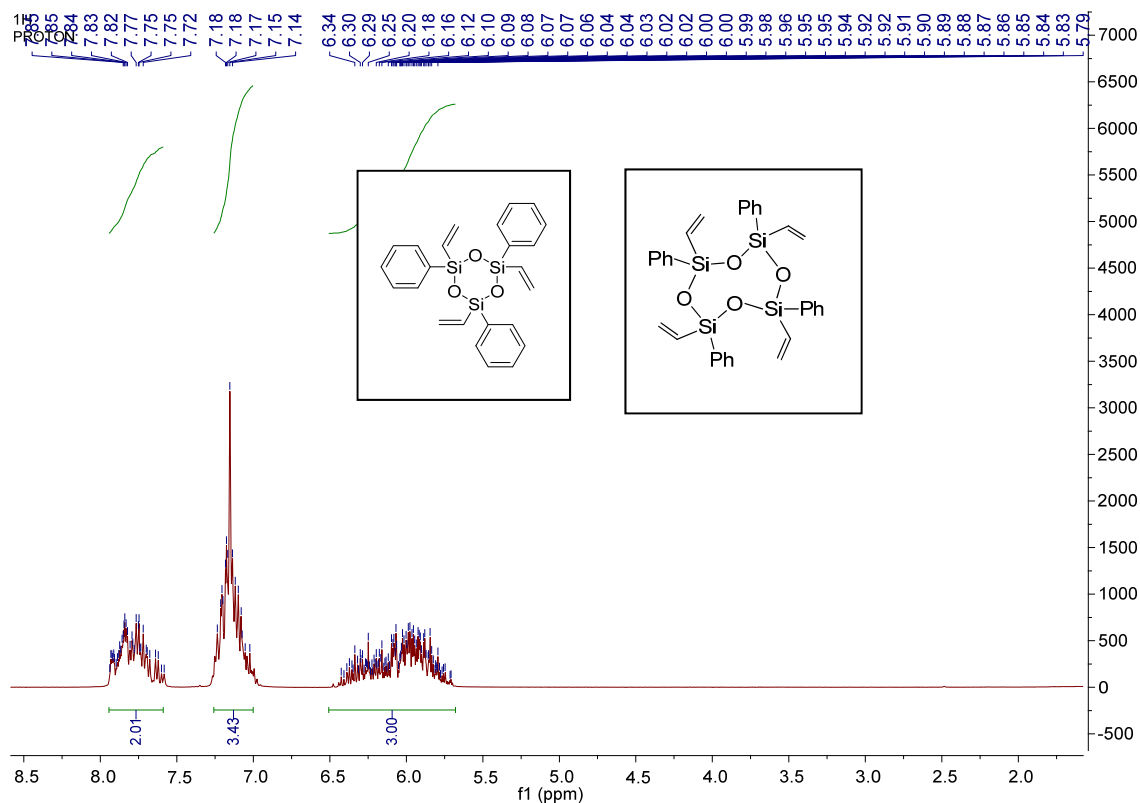

Figure S15.  $^1\text{H}$  NMR spectrum of vinyl $\text{D}_3$  and vinyl $\text{D}_4$  in  $\text{C}_6\text{D}_6$ .

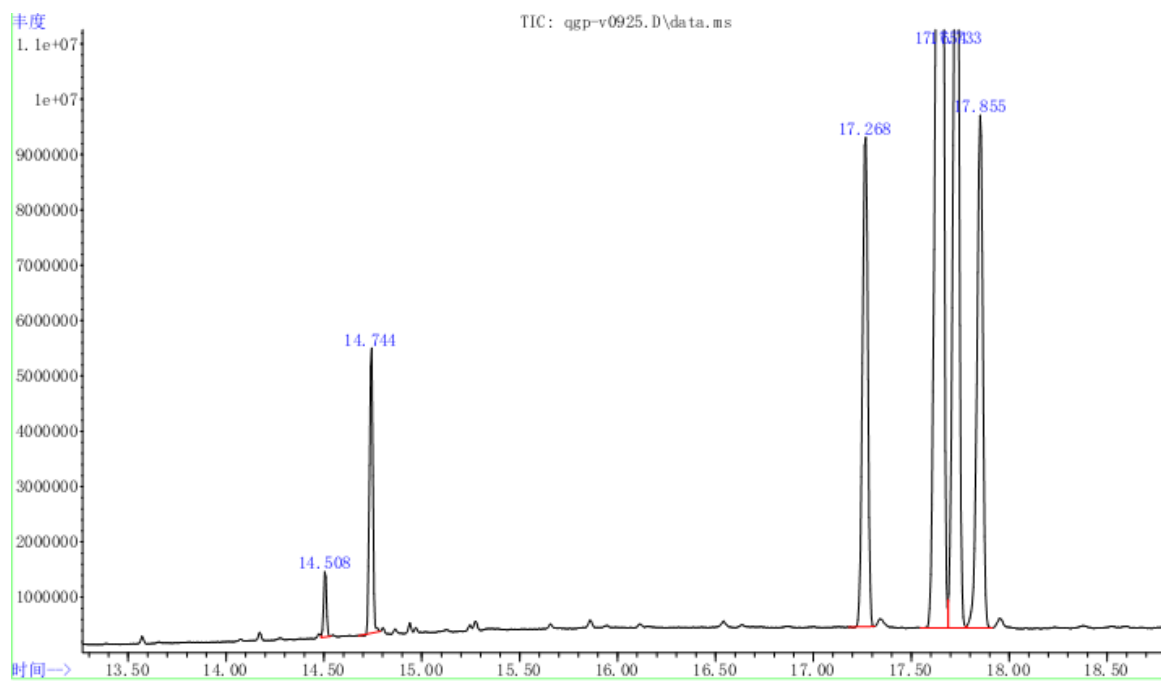

Figure S16. GC-MS spectrum of vinyl $\text{D}_3$  and vinyl $\text{D}_4$ .

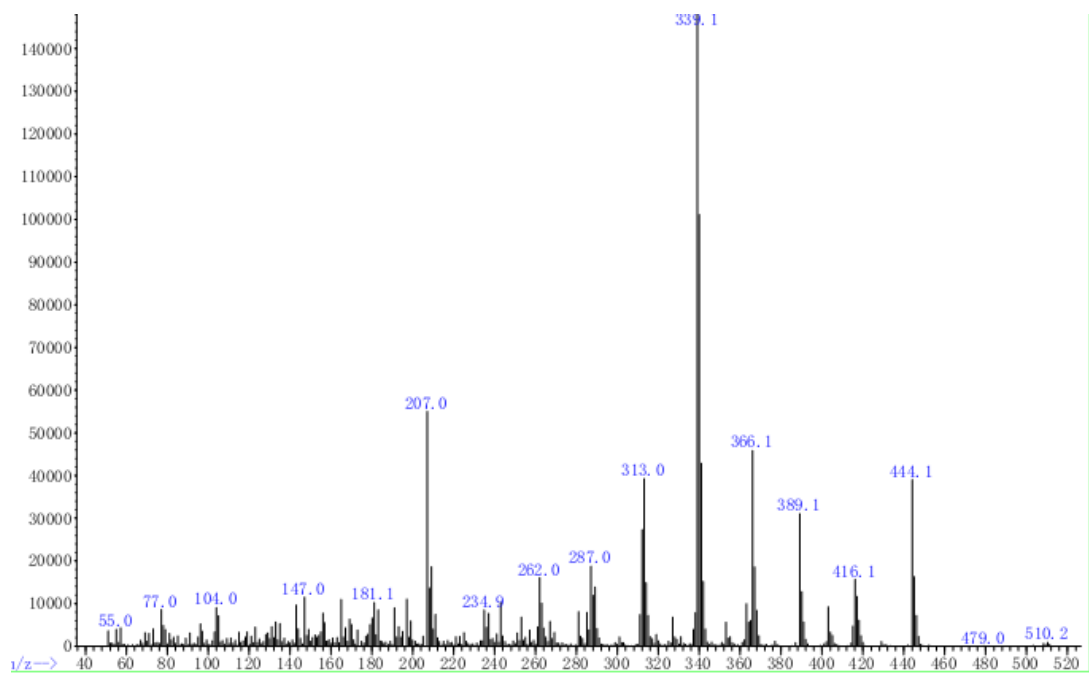

**Figure S17.** GC-MS spectrum of vinyl-D<sub>3</sub>.

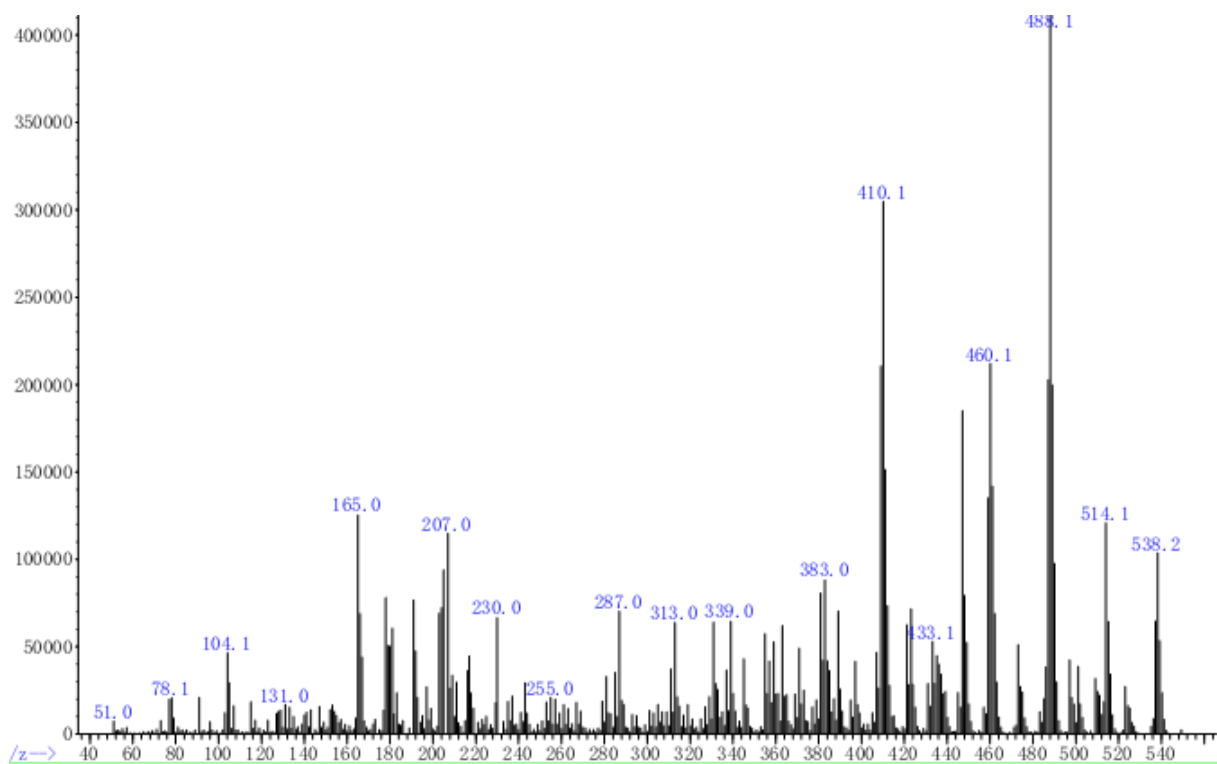

**Figure S18.** GC-MS spectrum of vinyl-D<sub>4</sub>.

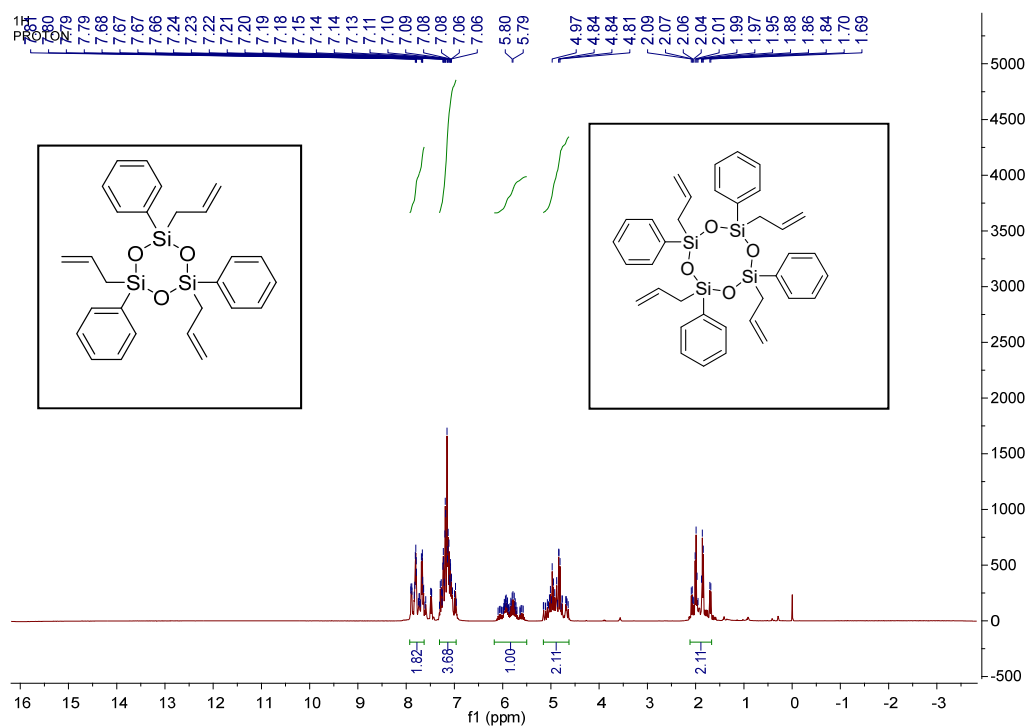

Figure S19.  $^1\text{H}$  NMR spectrum of  $^{\text{allyl}}\text{D}_3$ ,  $^{\text{allyl}}\text{D}_4$  in  $\text{C}_6\text{D}_6$

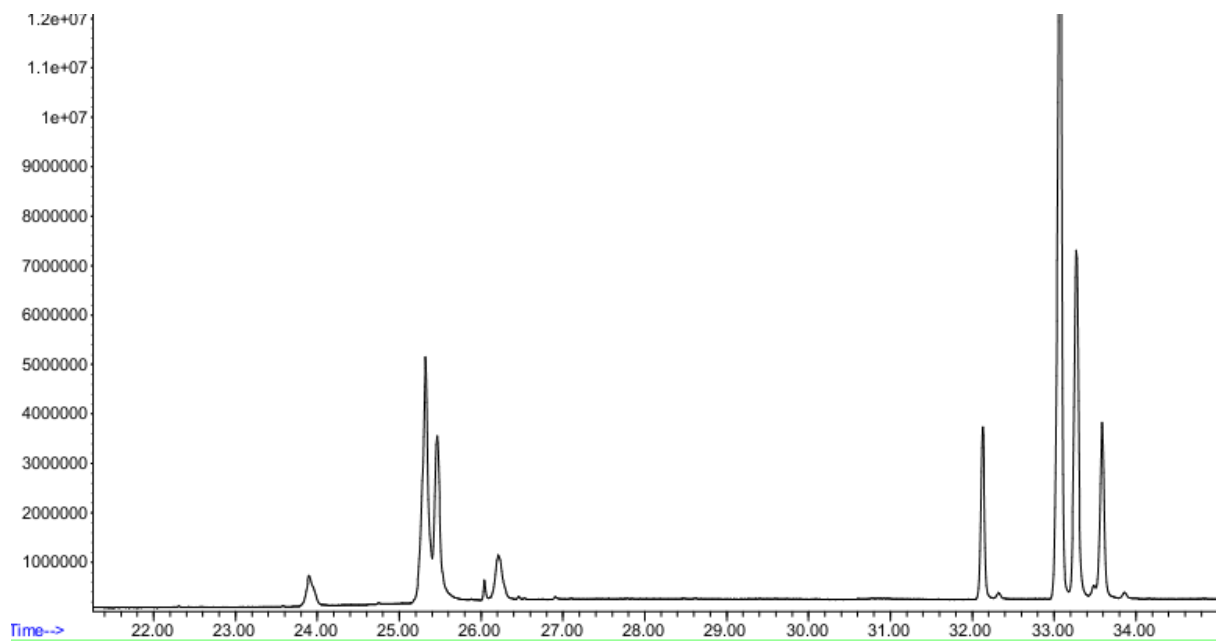

Figure S20. GC-MS spectrum of  $^{\text{allyl}}\text{D}_3$  and  $^{\text{allyl}}\text{D}_4$ .



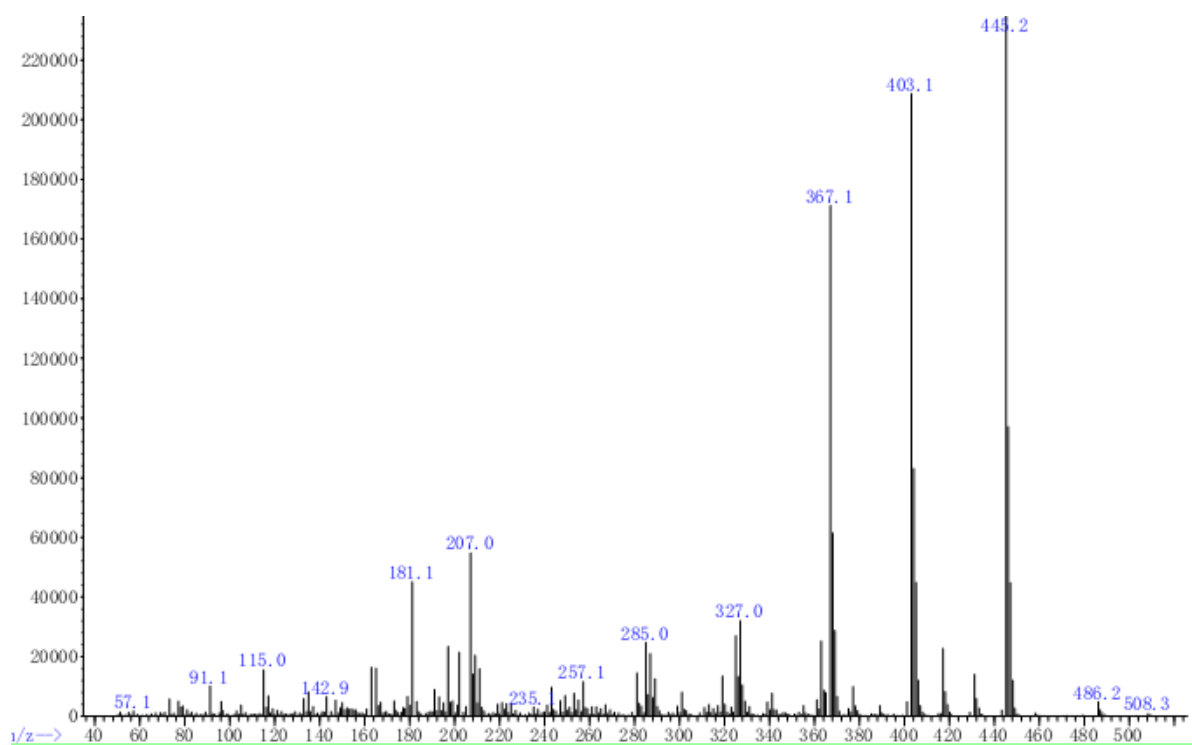

Figure S21. GC-MS spectrum of allyl-D<sub>3</sub>.

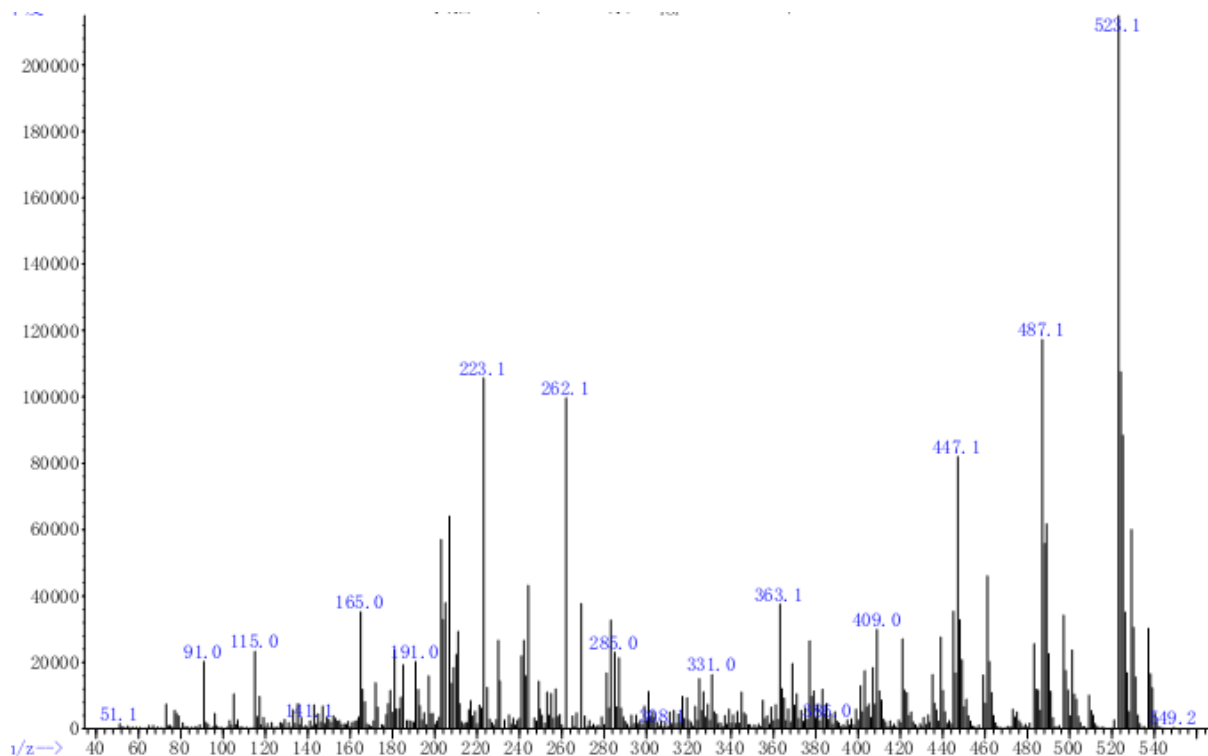

Figure S22 .GC-MS spectrum of allyl-D<sub>4</sub>.

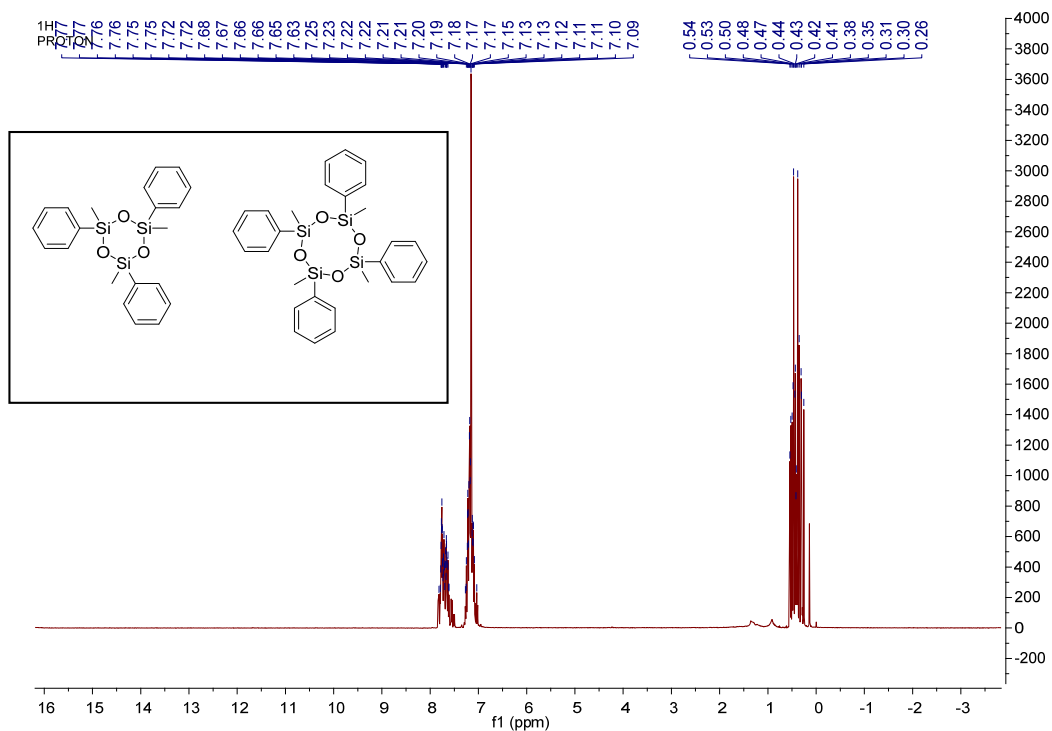

Figure S23.  $^1\text{H}$  NMR spectrum of  $\text{Me}_3\text{D}_3$  and  $\text{Me}_4\text{D}_4$  in  $\text{C}_6\text{D}_6$

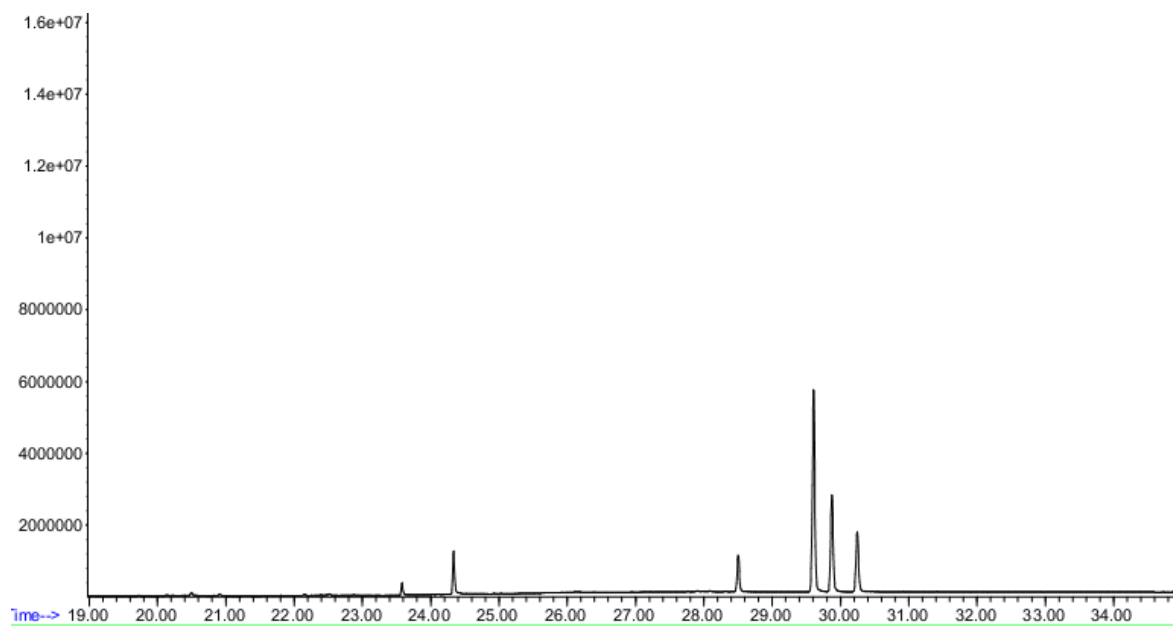

Figure S24. GC-MS spectrum of  $\text{Me}_3\text{D}_3$  and  $\text{Me}_4\text{D}_4$ .

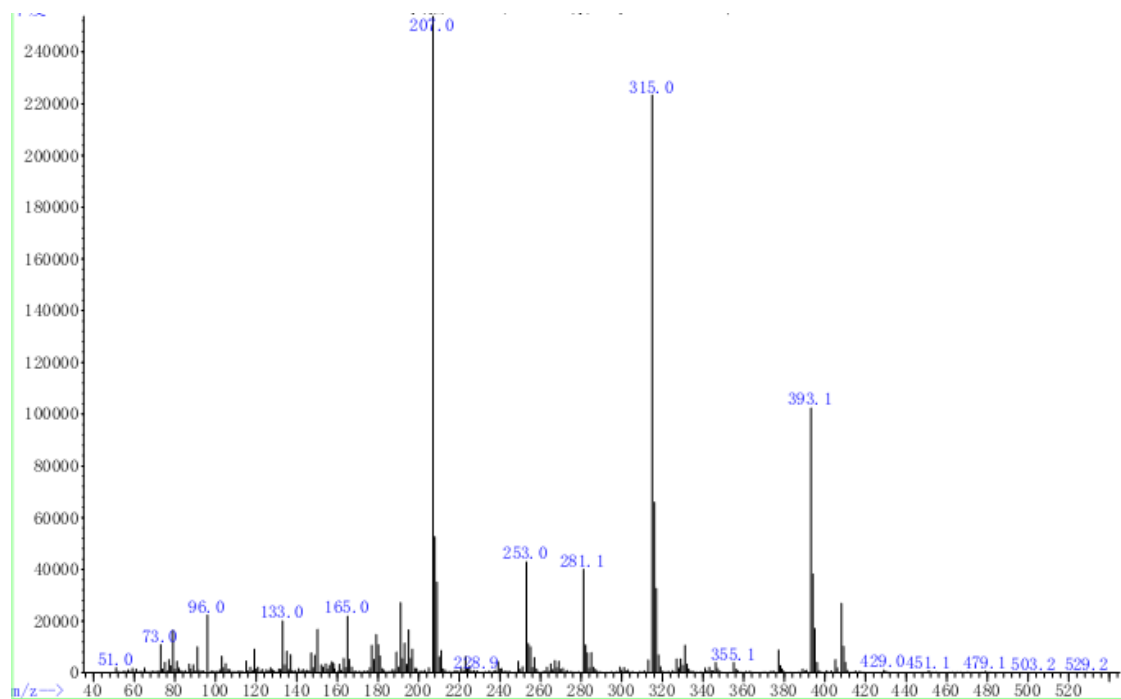

Figure S25. GC-MS spectrum of  $^{\text{Me}}\text{D}_3$ .

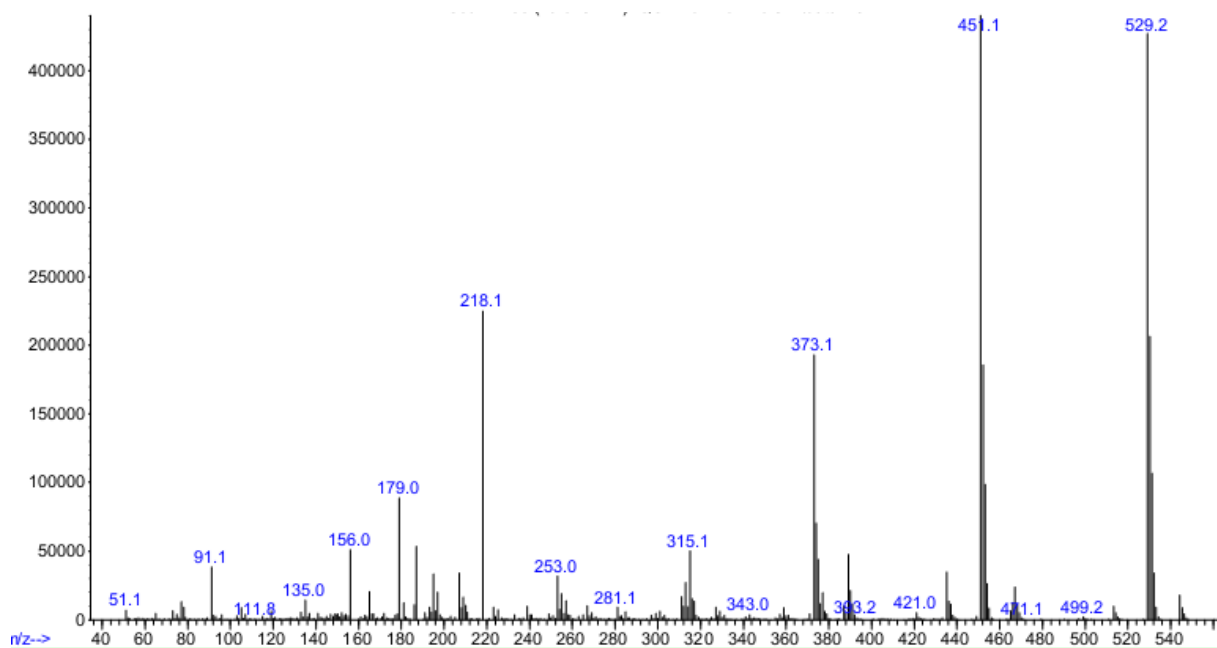

Figure S26. GC-MS spectrum of  $^{\text{Me}}\text{D}_4$ .

## References

- S1 (a) A. J. Arduengo, H. V. R. Dias, R. L. Harlow, M. Kline, *J. Am. Chem. Soc.* 1992, **114**, 5530; (b) R. A. Kunetskiy, I. Cisarova, D. Saman, I. M. Lyapkalo, *Chem. Eur. J.* 2009, **15**, 9477; (c) F. Hanasaka, K. -I. Fujita, R. Yamaguchi, *Organometallics* 2005, **24**, 3422.
- S2 N. Hirone, H. Sanjiki, R. Tanaka, T. Hata, H. Urabe, *Angew. Chem. Int. Ed.* 2010, **49**, 7762.
- S3 A. Berkefeld, W. E. Piers, M. Parvez, *J. Am. Chem. Soc.* 2010, **132**, 10660.
- S4 Y. R. Jorapur, T. Shimada, *Synlett* 2012, **23**, 1633.
- S5 A. Albright, R. E. Gawley, *Tetrahedron Lett.* 2011, **52**, 6130.
- S6 (a) D. S. Fattakhova, V. V. Jouikov, M. G. Voronkov, *J. Organomet. Chem.* 2000, **613**, 170; (b) T. L. Krasnova, *Zh. ObshcheiKhim.* 1985, **55**, 1528.
- S7 P. Zak, C. Pietraszuk, B. Marciniak, *J. Mol. Catal. A: Chem.* 2008, **289**, 1.
- S8 (a) V. V. Zuev, Z. V. Kalinin, *Phosphorus, Sulfur and Silicon and the Related Elements* 2003, **178**, 1289; (b) M.-H. Yang, H.-W. Liu, H. -T. Lin, *J. Chin. Chem. Soc.* 2004, **51**, 791; (c) R. K. Harris, B. J. Kimber, M. D. Wood, A. Holt, *J. Organomet. Chem.* 1976, **116**, 291; (d) A. A. Bychkova, F. V. Soskov, A. I. Demchenko, P. A. Storozhenko, A. M. Muzafarov, *Russ. Chem. Bull. Int. Ed.* 2011, **60**, 2384.
